# Supplementary material for: Facile fabrication of anti-fouling polymeric membrane potentiometric ion sensors based on a biocide 4,5-dichloro-2-n-octyl-4-isothiazolin-3-one-containing self-adhesive waterborne polyurethane coating
Source: Royal Society of Chemistry journal article supplement (doi:10.1039/d4an01583e), 2025-01-01
Supplement: d4an01583e1.pdf [file d4an01583e1.pdf]

**Supporting Information for**

**Facile fabrication of anti-fouling polymeric membrane  
potentiometric ion sensors based on a biocide 4,5-dichloro-2-*n*-octyl-  
4-isothiazolin-3-one-containing self-adhesive waterborne  
polyurethane coating**

Ying Zhou <sup>a, c</sup>, Rongning Liang <sup>a, \*</sup>, Wei Qin <sup>a, b, d</sup>

<sup>a</sup> CAS Key Laboratory of Coastal Environmental Processes and Ecological Remediation, Yantai Institute of Coastal Zone Research (YIC), Chinese Academy of Sciences (CAS); Shandong Key Laboratory of Coastal Environmental Processes, YICCAS, Yantai, Shandong 264003, P. R. China

<sup>b</sup> Laboratory for Marine Biology and Biotechnology, Qingdao Marine Science and Technology Center, Qingdao, Shandong 266237, P. R. China

<sup>c</sup> University of Chinese Academy of Sciences, Beijing 100049, P. R. China

<sup>d</sup> Center for Ocean Mega-Science, Chinese Academy of Sciences, Qingdao, Shandong 266071, P. R. China

\* Corresponding author. Fax: +86-535-2109000

E-mail address: rnlwang@yic.ac.cn

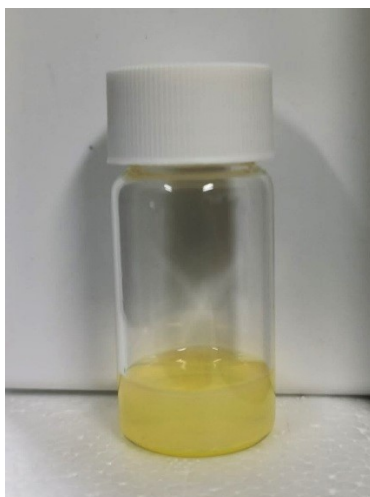

**Fig. S1.** The prepared self-adhesive anti-fouling polymer composite.

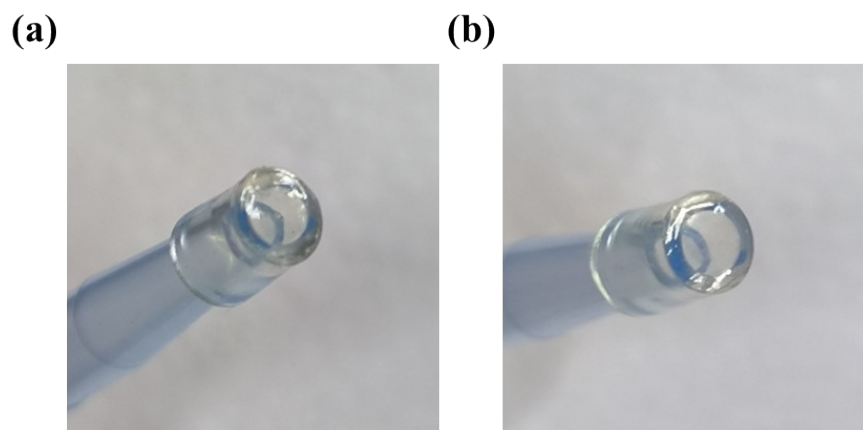

**Fig. S2.** Photographs showing the macro-observations of (a) the pristine plasticized PVC Ca<sup>2+</sup>-selective membrane and (b) the same membrane after modification of the self-adhesive anti-fouling coating.

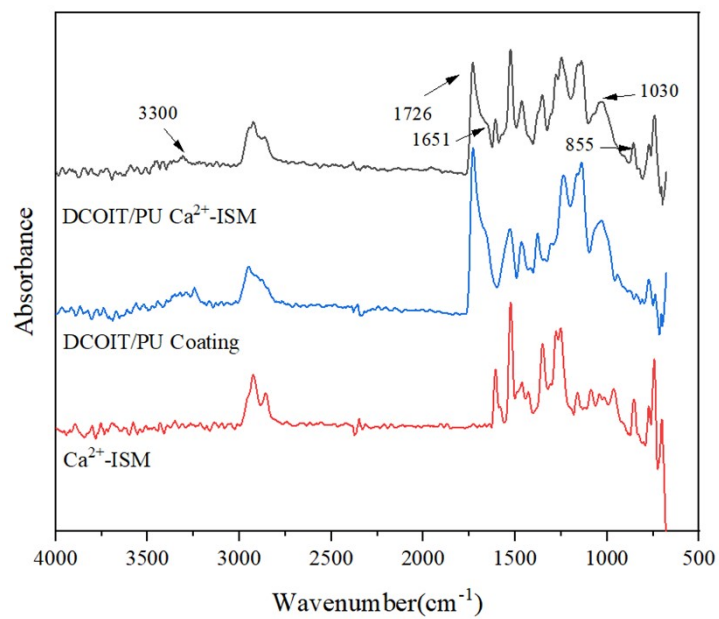

**Fig. S3.** ATR-FTIR spectra of DCOIT/PU coating and the ISM before and after DCOIT/PU modification.

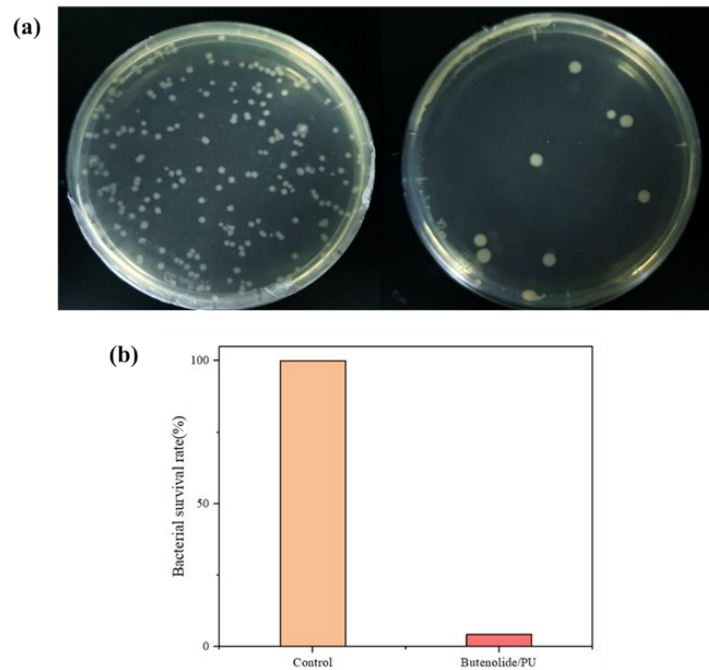

**Fig. S4.** Colony-forming units (CFUs) of the live *Bacillus Subtilis* cells adsorbed onto the membrane surfaces of the control blank and DCOIT/PU-coated  $\text{Ca}^{2+}$ -ISEs after contact with a bacterial suspension solution ( $\sim 10^8$  CFU  $\text{mL}^{-1}$ ) for 6 h. Inset shows the corresponding images of bacterial culture plates of the *Bacillus Subtilis* cells adhered on the membranes.

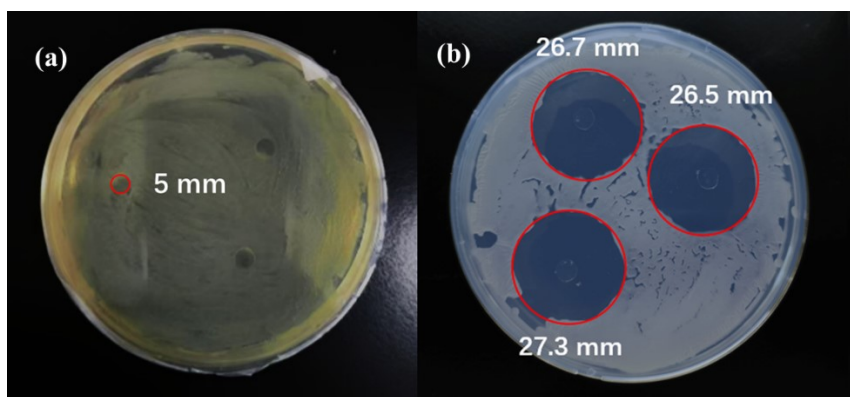

**Fig. S5.** Inhibition zones and their diameters formed on solid culture media after 24-h incubation at 37°C: (a) Blank ISM; (b) DCOIT/PU-coated ISM.
